# Supplementary material
Source: PubMed Central journal article supplement (PMC552897)
Supplement: pnas_102_9_3296__1.pdf [file pnas_102_9_3296__1.pdf]

**Table 1. PCR primers**

| Primer                                 | Base sequence               | Fragment length, bp | OAT, °C |
|----------------------------------------|-----------------------------|---------------------|---------|
| Human 1 $\alpha$ hydroxylase sense     | CCTGAACAACGTAGTCTGCG        | 620                 | 58      |
| Human 1 $\alpha$ hydroxylase antisense | CAGCTGTGATCTCTGAGTGG        |                     |         |
| Human NBC-1 sense                      | GCCCAGTAACCTTGGGGAGA        | 94                  | 56      |
| Human NBC-1 antisense                  | GCAGAAGTGAAAATACTGTGG       |                     |         |
| Human Kir6.1 sense                     | TGGCTGCTCTTCGCTATCAT        | 447                 | 64      |
| Human Kir6.1 antisense                 | TTTCTTGACCACCTGGATGC        |                     |         |
| Human SUR2 sennse                      | ACATTGCCTACTTATTTCTCTC      | 685                 | 60      |
| Human SUR2 antisense                   | AGAGATTTGACCATATTCTTCA      |                     |         |
| Human AQP-1 sense                      | CTTGGACACCTCCTGGCTATTGAC    | 625                 | 58      |
| Human AQP-1 antisense                  | AGCAGGTGGGTCCCTTTCTTTTAC    |                     |         |
| Human PTH sense                        | GATGCAGATGACGTCATGAC        | 482                 | 56      |
| Human PTH antisense                    | CAGGCGGTCAAACACCTCCCG       |                     |         |
| Human GLEPP-1 sense                    | TCACTGTGGAGATGATTTTCAGAGG   | 74                  | 58      |
| Human GLEPP-1 antisense                | CGTCAGCATAGTTGATCCGGA       |                     |         |
| Human nephrin sense                    | CAACTGGGAGAGACTGGGAGAA      | 188                 | 58      |
| Human nephrin antisense                | AATCTGACAACAAGACGGAGCA      |                     |         |
| Human podocin sense                    | AAGAGTAATTATATCCGACTGGGACAT | 149                 | 58      |
| Human podocin antisense                | TGGTCACGATCTCATGAAAAGG      |                     |         |
| Human $\beta$ -microgloblin sense      | CAGGTTTACTCACGTCATCCAGC     | 235                 | *       |
| Human $\beta$ -microgloblin antisense  | TCACATGGTTCACACGGCAGG       |                     |         |
| Rat GDPDH sense                        | CATCAACGACCCCTTCATT         | 197                 | *       |
| Rat GDPDH antisense                    | ACTCCACGACATACTCAGCAC       |                     |         |

\*For human MG and rat GDPDH, two step amplification (1min at 94°C and 1 min at 66°C, 43 cycles) were applied. PCR conditions were as follows: 10 min at 95°C for 45 s at 94°C, 1 min at the optimal annealing temperature (OAT) and 1 min at 72°C, 36 cycles; 10 min at 72°C.
